# Supplementary material
Source: PubMed Central journal article supplement (PMC6744291)

**Supplemental Table 1. Plasma hematological indices from WT and SAD mice carrying individual and combined knockouts of *Kcnn4*, *Kcc1* and *Kcc3*.**

| <b>Genotype</b>                                                                           | <b>n</b> | <b>T. Bili<br/>(mg/dL)</b> | <b>LDH<br/>(U/L)</b> | <b>Iron<br/>(<math>\mu</math>g/dL)</b> |
|-------------------------------------------------------------------------------------------|----------|----------------------------|----------------------|----------------------------------------|
| <b>WT<sup>Kcnn4</sup></b>                                                                 | 6        | 0.8 $\pm$ 0.2              | 561.2 $\pm$ 102      | 123.8 $\pm$ 15                         |
| <b><i>Kcnn4</i><sup>-/-</sup></b>                                                         | 12       | 0.2 $\pm$ 0**              | 335.8 $\pm$ 41*      | 115.2 $\pm$ 5                          |
| <b>WT<sup>SAD</sup></b>                                                                   | 9        | 0.4 $\pm$ 0.1              | 314.7 $\pm$ 28       | 109.6 $\pm$ 4.4                        |
| <b><i>Kcnn4</i><sup>-/-</sup>;<i>Kcc1</i><sup>-/-</sup>;<i>Kcc3</i><sup>-/-</sup></b>     | 6        | 0.2 $\pm$ 0.1              | 321.3 $\pm$ 32       | 129.0 $\pm$ 21                         |
| <b>SAD</b>                                                                                | 6        | 0.5 $\pm$ 0.3              | 441.3 $\pm$ 53*      | 99.4 $\pm$ 4                           |
| <b>SAD;<i>Kcnn4</i><sup>-/-</sup></b>                                                     | 6        | 0.1 $\pm$ 0                | 390.2 $\pm$ 60       | 109.5 $\pm$ 6                          |
| <b>SAD;<i>Kcnn4</i><sup>-/-</sup>;<i>Kcc1</i><sup>-/-</sup>;<i>Kcc3</i><sup>-/-</sup></b> | 6        | 0.2 $\pm$ 0.1              | 371.3 $\pm$ 45       | 119.2 $\pm$ 7*                         |

**Supplemental Table 2. Spleen/weight Ratio stratified by sex.**

| <b>Genotype</b>                | <b>Female</b> | <b>Male</b>   | <b>p value</b> |
|--------------------------------|---------------|---------------|----------------|
| <b>WT<sup>C57</sup></b>        | 3.7±0.1(29)   | 3.2±0.3 (4)   | ns             |
| <b>WT<sup>SAD</sup></b>        | 3.65±.12 (48) | 2.84±0.1 (72) | 0.0001         |
| <b>WT<sup>Kcnn4</sup></b>      | 5.55±0.9 (73) | 3.7±0.95 (81) | 0.0001         |
| <b>Kcnn4<sup>-/-</sup></b>     | 6.09±0.2 (95) | 4.2±0.1 (72)  | 0.0001         |
| <b>2xKO</b>                    | 2.76±0.1 (39) | 2.75±0.1(44)  | ns             |
| <b>3xKO</b>                    | 7.78±0.4 (34) | 7.4±0.3 (27)  | ns             |
| <b>SAD</b>                     | 5.6±0.3 (44)  | 3.7±0.1 (54)  | 0.0001         |
| <b>SAD;Kcnn4<sup>-/-</sup></b> | 7.5±0.6 (32)  | 5.2±0.5 (45)  | 0.0001         |
| <b>SAD;2xKO</b>                | 2.74±0.6 (7)  | 3.9±0.7 (8)   | ns             |
| <b>SAD;3xKO</b>                | 9.9±0.7 (22)  | 8.1±0.6 (19)  | ns             |

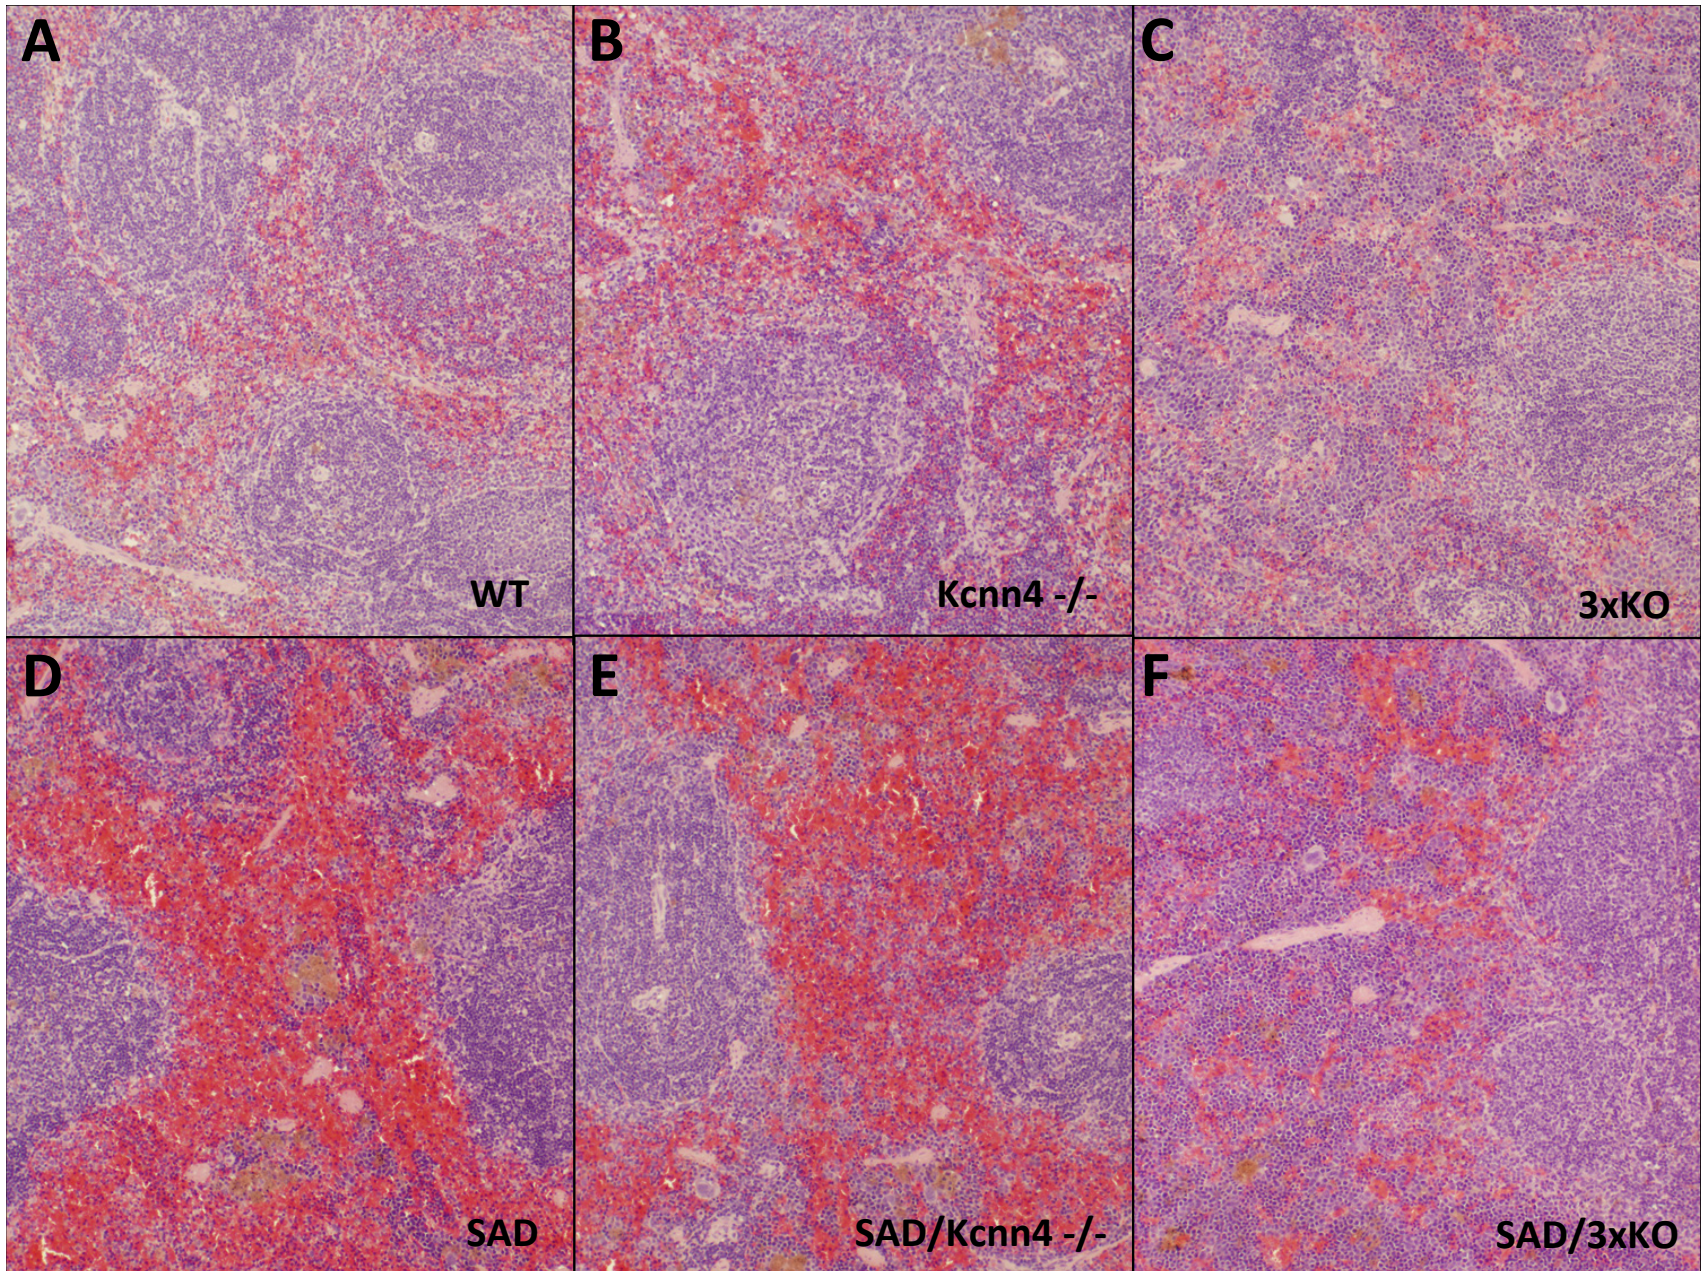

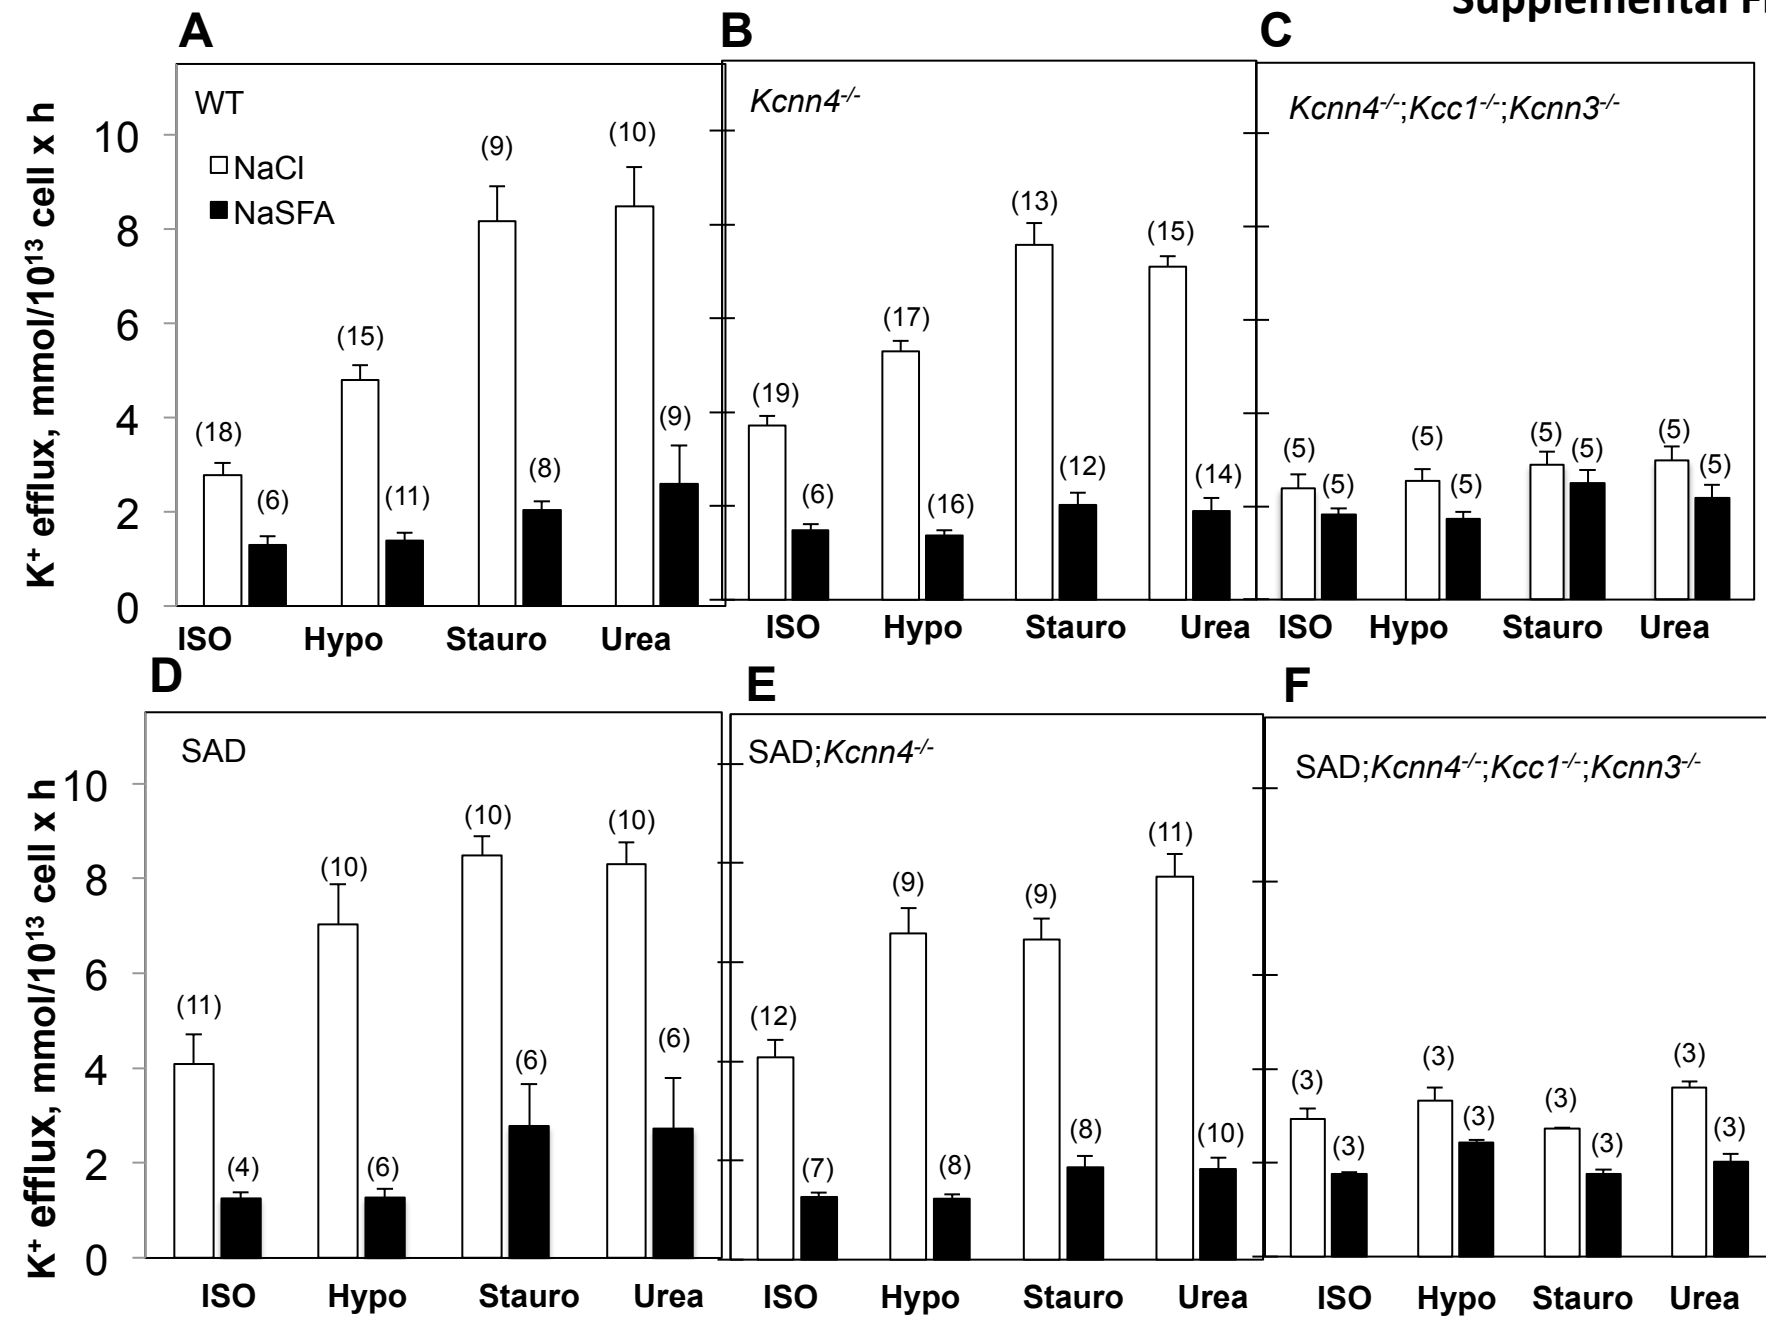

Supplement: NIHMS1536287-supplement-1.pdf [file NIHMS1536287-supplement-1.pdf]
